# Supplementary material for: The Interplay between Child Maltreatment and Stressful Life Events during Adulthood and Cardiovascular Problems—A Representative Study
Source: MDPI journal article supplement (doi:10.3390/jcm10173937), 2021-08-31
Supplement: s1 [file s1]

**Table S1.** Moderation analysis of adult stressful life events, child maltreatment and cardiovascular outcomes.

|                             | Chi <sup>2</sup> (df) | p-value | R <sup>2</sup> | Z-value | 95% CI        | p-value |
|-----------------------------|-----------------------|---------|----------------|---------|---------------|---------|
| <b>Obesity</b>              |                       |         |                |         |               |         |
|                             | 41.20<br>(4)          | <0.001  | 0.03           |         |               |         |
| Adult stressful life events |                       |         |                | 3.48    | [0.17;0.62]   | <0.001  |
| Child maltreatment          |                       |         |                | 2.58    | [0.04;0.28]   | 0.010   |
| Interaction                 |                       |         |                | 0.37    | [-0.11; 0.16] | 0.714   |
| Age                         |                       |         |                | 0.37    | [-0.01;0.01]  | 0.711   |
| <b>Diabetes</b>             |                       |         |                |         |               |         |
|                             | 140.30 (4)            | <0.001  | 0.15           |         |               |         |
| Adult stressful life events |                       |         |                | 2.31    | [0.06;0.70]   | 0.021   |
| Child maltreatment          |                       |         |                | 2.75    | [0.07;0.44]   | 0.006   |
| Interaction                 |                       |         |                | -0.21   | [-0.20;0.16]  | 0.8326  |
| Age                         |                       |         |                | 8.44    | [0.04;0.06]   | < 0.001 |
| <b>Hypertension</b>         |                       |         |                |         |               |         |
|                             | 422.23(4)             | <0.001  | 0.24           |         |               |         |
| Adult stressful life events |                       |         |                | 2.09    | [0.01;0.43]   | 0.037   |
| Child maltreatment          |                       |         |                | 3.73    | [0.11;0.34]   | <0.001  |
| Interaction                 |                       |         |                | -0.97   | [-0.20;0.07]  | 0.330   |
| Age                         |                       |         |                | 16.17   | [0.05;0.06]   | <0.001  |
| <b>MI</b>                   |                       |         |                |         |               |         |

|                             |           |       |      |       |              |        |
|-----------------------------|-----------|-------|------|-------|--------------|--------|
|                             | 85.25 (4) | 0.711 | 0.17 |       |              |        |
| Adult stressful life events |           |       |      | 2.22  | [0.07;1.07]  | 0.026  |
| Child maltreatment          |           |       |      | 2.74  | [0.11;0.67]  | 0.006  |
| Interaction                 |           |       |      | -0.50 | [-0.31;0.19] | 0.616  |
| Age                         |           |       |      | 5.99  | [0.04;0.08]  | <0.001 |

**Table S2.** Predictors of cardiovascular risk factors and myocardial infarction, differentiated for interpersonal and other adult stressful life events as well as childhood abuse and childhood neglect. Analyzed via stepwise logistic regression, adjusted for gender and age.

|                                           | Obesity   |            |         | Diabetes   |            |         | Hypertension |            |         | Myocardial infarction |            |         |
|-------------------------------------------|-----------|------------|---------|------------|------------|---------|--------------|------------|---------|-----------------------|------------|---------|
|                                           | OR        | 95% CI     | p-value | OR         | 95% CI     | p-value | OR           | 95% CI     | p-value | OR                    | 95% CI     | p-value |
| Model 1                                   |           |            |         |            |            |         |              |            |         |                       |            |         |
| Interpersonal adult stressful life events | 2.54      | 1.80; 3.59 | 0.000   | 1.00       | 0.52; 1.92 | 0.997   | 1.53         | 1.06; 2.21 | 0.023   | 1.54                  | 0.55; 4.28 | 0.408   |
| Other adult stressful life events         | 1.29      | 1.03; 1.62 | 0.026   | 1.69       | 1.26; 2.26 | <0.001  | 1.15         | 0.93; 1.40 | 0.190   | 2.04                  | 1.33; 3.15 | 0.001   |
| Chi² (df)                                 | 53.99 (4) |            |         | 129.35 (4) |            |         | 411.983 (4)  |            |         | 99.53 (4)             |            |         |
| R²                                        | 0.037     |            |         | 0.138      |            |         | 0.24         |            |         | 0.20                  |            |         |
| Model 2                                   |           |            |         |            |            |         |              |            |         |                       |            |         |
| Interpersonal adult stressful life events | 2.31      | 1.63; 3.29 | 0.000   | 0.84       | 0.43; 1.64 | 0.611   | 1.39         | 0.96; 2.02 | 0.082   | 1.32                  | 0.47; 3.71 | 0.602   |

|                                   |           |            |       |            |            |       |            |            |       |            |            |       |
|-----------------------------------|-----------|------------|-------|------------|------------|-------|------------|------------|-------|------------|------------|-------|
| Other adult stressful life events | 1.25      | 1.00; 1.58 | 0.054 | 1.63       | 1.21; 2.18 | 0.001 | 1.12       | 0.92; 1.38 | 0.266 | 1.98       | 1.28; 3.08 | 0.002 |
| Childhood abuse                   | 1.31      | 1.08; 1.58 | 0.006 | 1.45       | 1.11; 1.89 | 0.006 | 1.20       | 0.99; 1.46 | 0.067 | 1.44       | 0.98; 2.13 | 0.065 |
| Childhood neglect                 | 1.03      | 0.86; 1.24 | 0.748 | 1.15       | 0.89; 1.50 | 0.285 | 1.22       | 1.04; 1.44 | 0.018 | 1.52       | 1.03; 2.25 | 0.035 |
| Chi <sup>2</sup> (df)             | 64.06 (6) |            |       | 143.20 (6) |            |       | 472.15 (6) |            |       | 112.90 (6) |            |       |
| R <sup>2</sup>                    | 0.044     |            |       | 0.15       |            |       | 0.25       |            |       | 0.23       |            |       |

---
